# Supplementary material for: Reprogramming of gene expression during compression wood formation in pine: Coordinated modulation of S-adenosylmethionine, lignin and lignan related genes
Source: PubMed Central journal article supplement (PMC3406974; doi:10.1186/1471-2229-12-100), 2012-06-29
Supplement: 1471-2229-12-100-S5.pdf [file 1471-2229-12-100-S5.pdf]

| Gene           | Primer sequence                  | Orientation | GenBank Accession number of full-length cDNA sequence |
|----------------|----------------------------------|-------------|-------------------------------------------------------|
| <i>GDCH</i>    | 5' -ACAGATGATCTAGGACATGC-3'      | Forward     |                                                       |
| <i>GDCH</i>    | 5' -CACTTATTTGCACTTGAAGG-3'      | Reverse     | HE574563                                              |
| <i>GS1b</i>    | 5' -TGATTGCTGAGACCAACCATCC-3'    | Forward     |                                                       |
| <i>GS1b</i>    | 5' -GGGAAATACTTTAGGCACAGAGAG-3'  | Reverse     | AJ005119                                              |
| <i>MS</i>      | 5' -ACATGGTTGCATCTGCCAAG-3'      | Forward     |                                                       |
| <i>MS</i>      | 5' -CAAGACCACAAACCAACTAACC-3'    | Reverse     | HE566045                                              |
| <i>SAHH</i>    | 5' -CCGTTGAGGGACCTTACAAG-3'      | Forward     |                                                       |
| <i>SAHH</i>    | 5' -TGGAACAAAACAATGGAGCCG-3'     | Reverse     | HE574555                                              |
| <i>SAMS</i>    | 5' -CCTGGCATGATTTCTATCAACC-3'    | Forward     |                                                       |
| <i>SAMS</i>    | 5' -TGA CT TGCCCTCTTACTTCACAG-3' | Reverse     | HE574556                                              |
| <i>mSHMT</i>   | 5' -CCACACTTCCAAGCTGAAATTG-3'    | Forward     |                                                       |
| <i>mSHMT</i>   | 5' -TCAAAGCTGGTCTGTA ACTCC-3'    | Reverse     | HE574554                                              |
| <i>cSHMT</i>   | 5' -GCACAGTTTGATATGCCTGG-3'      | Forward     |                                                       |
| <i>cSHMT</i>   | 5' -ATCCCTCTAGCTACCAACTTTC-3'    | Reverse     | HE574564                                              |
| <i>HCT</i>     | 5' -TGCAACCAGATCATATGGCTC-3'     | Forward     |                                                       |
| <i>HCT</i>     | 5' -ATCCCGAGTACAATTCTCCATG-3'    | Reverse     | HE574565                                              |
| <i>COMT</i>    | 5' -GGCGTTAAACCTGTCTGTTG-3'      | Forward     |                                                       |
| <i>COMT</i>    | 5' -AATCGTAGTGGGGACTCTAGG-3'     | Reverse     | HE574557                                              |
| <i>CCoAOMT</i> | 5' -TCCCCTGAGGAAATATGTGAG-3'     | Forward     |                                                       |
| <i>CCoAOMT</i> | 5' -CAATAGACGAGCAGAAACAAGG-3'    | Reverse     | FN824798                                              |
| <i>MTHFR</i>   | 5' -TTGTATCCCGATGGTGATCC-3'      | Forward     |                                                       |
| <i>MTHFR</i>   | 5' -AACCACACTGTGACAGCTTC-3'      | Reverse     | HE574560                                              |
| <i>PHGDH</i>   | 5' -AGATGACGAACCGACAAAGG-3'      | Forward     |                                                       |
| <i>PHGDH</i>   | 5' -ATGCTCTAGTTGTGCCCTGA-3'      | Reverse     | HE574561                                              |
| <i>PSAT</i>    | 5' -TAAGGGACATCGATCAGTGG-3'      | Forward     |                                                       |
| <i>PSAT</i>    | 5' -AGCCTTG CAGATTTGAGACC-3'     | Reverse     | HE574562                                              |
| <i>PPDBR</i>   | 5' -ACCTGTCATTTATCTGGGGC-3'      | Forward     |                                                       |
| <i>PPDBR</i>   | 5' -GGCTTGAGACAAATGACTGC-3'      | Reverse     | HE575885                                              |
| <i>PLR</i>     | 5' -TCAATCCAACCAACTGGAGG-3'      | Forward     |                                                       |
| <i>PLR</i>     | 5' -CAAAGCAATCCTGATACGAGCG-3'    | Reverse     | HE574558                                              |
| <i>PCBER</i>   | 5' -TACCACTGTCGATGAGTACC-3'      | Forward     |                                                       |
| <i>PCBER</i>   | 5' -ACAGGAGTTCTGTTCTGCC-3'       | Reverse     | HE574559                                              |

| Reference gene                 | Primer sequence                 | Orientation |
|--------------------------------|---------------------------------|-------------|
| <i>L34</i>                     | 5' -CTAGGAGTTAGGGTTAAGATGC-3'   | Forward     |
| <i>L34</i>                     | 5' -GGTACATGGTCAAAAACAAGCATG-3' | Reverse     |
| <i>ACT</i>                     | 5' -ATCTCTCAGCACATTTCCAACAG-3'  | Forward     |
| <i>ACT</i>                     | 5' -TATTGCCACCATCATCTCAAGC-3'   | Reverse     |
| <i>EF1 <math>\alpha</math></i> | 5' -TGCTGTTGGAGTCATCAAGG-3'     | Forward     |
| <i>EF1 <math>\alpha</math></i> | 5' -CTCGTGCATCAGAATCAGACA-3'    | Reverse     |
| <i>UBI-like</i>                | 5' -ACGATCATGTTTTTCAACTACGC-3'  | Forward     |
| <i>UBI-like</i>                | 5' -TCATAACCATCAGAATGCCAATC-3'  | Reverse     |
| <i>27s</i>                     | 5' -TCTTGAGAGTGGAGAATGGG-3'     | Forward     |
| <i>27s</i>                     | 5' -CGCATCAGTCATACTCACCT-3'     | Reverse     |
